# Supplementary material for: Green chemical processing in the teaching laboratory: a convenient liquid CO2 extraction of natural productsElectronic supplementary information (ESI) available: experimental procedure (including instructors? notes, student handout, and demonstration procedure) and movie clip of extraction process. See http://www.rsc.org/suppdata/gc/b4/b405810k/
Source: Royal Society of Chemistry journal article supplement (doi:10.1039/b405810k), 2004-01-01
Supplement: b405810k.doc [file b405810k.doc]

**Notes to Instructors:**

**Liquid CO2 Extraction of D-Limonene from Orange Rind**

This experiment was developed as a reliable, convenient, inexpensive, and safe approach to CO2 extraction which could be performed easily in the teaching laboratory. A secondary goal was to allow students to visually observe the phase changes of CO2. Several liquid and supercritical CO2 laboratory exercises have been developed, but these approaches show the phase change for a limited time and do not allow for extraction or require expensive extraction equipment and limit visualization of the phase changes.1-3 We sought to make carbon dioxide extraction of natural products widely accessible and lengthen the observation period of phase changes, while maintaining the safety demonstrated in other procedures.

This laboratory serves as a greener drop-in replacement for current natural product extraction procedures. The chemical concepts and techniques of traditional labs can be easily taught through the use of this procedure. Green chemistry principles and methods also are introduced with this laboratory, specifically those of waste prevention and the use of a greener solvent. Comparisons of product purity, generation of waste, and risk to students and the environment indicate that this procedure provides the greenest natural product extraction laboratory currently available. Additional benefits of the liquid CO2 extraction laboratory include opportunities to illustrate phase changes and to modernize curricula through the introduction of current scientific advances. Two excellent reviews provide detailed background information on current sustainable materials processing with CO2.4,5

**Estimated Lab Time**

1 – 2 hours

**Waste Collection and Disposal**

The waste from this experiment is not hazardous and requires no special handling. Although we do not recommend using the centrifuge tubes for more than five liquefactions, at the end of this experiment they can be washed and used for other non-pressurized processes or recycled with other plastics. Wire and metal screen can be reused or thrown away. Used orange rind and filter paper can be composted or placed in the garbage.

**Materials**

| **Item** | **Additional Information** | **Hazards** | **Quantity/Student** |
| --- | --- | --- | --- |
| orange |  |  | ½ medium-sized |
| 18-22 gauge copper wire |  |  | ~ 20 cm |
| cheese grater or zester | use of zester results in smaller pieces of rind which may increase product yield | sharp, may cut skin | 1 for every 10 students |
| weighing boat |  |  | 1 |
| 1.5 cm filter paper or  1.5 cm circle of metal  screen | Whatman #1 filter paper or approx. 16 x 16 mesh/34 gauge screen |  | 1 |
| 15 mL polypropylene centrifuge tube with  plug seal cap | Corning catalog #430052 |  | 2-3  (in case of need for tube or cap replacement) |
| transparent plastic cylinder  (polycarbonate or acrylic) | 11” in height with 1” inner diameter and 1/8” wall |  | 1, may be shared |
| crushed dry ice |  | very cold, even short contact may damage skin tissue | 1/5 pound |
| warm tap water |  |  |  |
| tweezers |  |  | 1 |
| alcohol thermometer  (20 ºC – 100 ºC) |  |  | 1 |
| spatula |  |  | 1 |

**Experiment Tips and Safety Concerns**

Extraction vessel –

In order to visualize liquid CO2 and use the solvent for extraction of compounds, the extraction vessel is required to be transparent and capable of withstanding at least 5.2 bar of pressure for an appropriate length of time. Although glass vessels meet these criteria, the risk of the vessel shattering and causing injury led to a decision to use only plastic during this experiment. Through an iterative process, many vessels, such as plastic pipettes, syringes, and microcentrifuge tubes, were rejected due to failures in safety or durability. Polypropylene centrifuge tubes met the required parameters: plastic, transparent, designed to withstand pressure, and able to be sealed. Although these tubes are not rated for internal pressure, the RCF values indicated that they would not be adversely affected by exposure to conditions of increased pressure.6 Polystyrene and 50 mL polypropylene centrifuge tubes both failed to withstand the pressure produced during the experiment and are therefore not recommended.

Containment cylinder –

Placing the centrifuge tube in a plastic cylinder or polycarbonate bottle of warm water serves three purposes: 1) further increases safety by providing an additional barrier, 2) promotes visualization by preventing formation of condensation on the outer surface of the tube, and 3) accelerates the liquefaction process. For this purpose, we have successfully used plastic graduated cylinders, acrylic hydrometer cylinders (available through stores which carry beer-making supplies), and homemade cylinders made from 12” lengths of acrylic tubing (1” ID, 1/8” wall) on 4” diameter acrylic bases.

Safety concerns –

The most serious safety concerns in this experiment involve the possibilities of cap discharge (most common occurrence) or vessel rupture (rarely observed).

During the testing phase of this experiment, caps blew off during approximately 4% of the extractions. All caps were directed upward by the containment cylinders. Caps remained on during all extractions when students 1) tightened the cap as tightly as possible and 2) did not use caps that were stripped. *In our experience, it was not possible to over tighten the cap.* **If the cap cannot be completely tightened and continues to turn, the stripped cap should be discarded and replaced.** Due to variations in the centrifuge tubes and caps, a tight seal is not always formed at their junction. In this case, the CO2 does not liquefy, and retightening of the cap or replacement of the cap or tube may be required. Although many modifications of the sealing process have been proposed, such as the use of Teflon tape or parafilm on the threads, it is important that the cap seal well enough to induce liquefaction but not so tightly that the gas cannot escape. The cap must allow the gaseous CO2 to escape slowly during the extraction and also must function as a safety valve.

During experiment development, attempts were made to observe the transition from the liquid to the solid phase by opening the cap while the CO2 was liquid. In two of these cases, the centrifuge tube ruptured, and plastic shards were propelled several feet from the demonstrator. Although no injuries occurred, it is recommended that the tubes always remain in containment cylinders during liquefaction. It is important to note that in our experience vessel rupture *only* occurred while attempting to release the pressure from the vessel when liquid CO2 was present.

Extraction notes –

The extraction conditions were designed to liquefy the CO2, and then allow the solvent to saturate the solid, move to a separate area of the tube, and evaporate. The solid trap uses filter paper or small-mesh metal screen to hold the rind, and pure product is isolated through the slow release of gaseous CO2 from the tube. No difficulties with the solid trap arrangement were observed over the course of three extractions using either filter paper or screen, but students reported higher product recoveries (up to 7%) when they used a metal screen in this step.

The experiment has been successfully performed when the water temperature is between 30 and 50 ºC. The temperature inside the tube (in the liquid CO2) is clearly less than the bath temperature. At lower bath temperatures, the CO2 sublimes and does not become liquid, and at higher temperatures the caps discharged more often. Although an upper pressure limit has not been determined, the pressure is assumed to be at least 5.2 bar in order to liquefy the CO2.

The liquid CO2 extraction conditions described in the student handout have been used to extract natural products successfully from the rinds of oranges, grapefruits, tangerines, and lemons. GC/MS analysis indicates that the CO2 extracts have ratios of D-limonene to other terpene compounds which are expected from the actual oil compositions.7 The oils from orange, grapefruit, and tangerine rinds contain >90% D-limonene, as opposed to the complex composition of lemon oil (approximately 63% limonene, 12% β-pinene, and 9% -terpinene). Straightforward analysis of these oils is therefore possible by both 1H NMR and IR spectroscopy.

**Data**

NMR - 1H NMR sample can be prepared in CDCl3. The spectrum is quite complex due

to the conformation of the protons on the cyclohexene ring. δH (400 MHz; CDCl3) 5.40 (1 H, t), 4.70 (2 H, s), 2.08 (1 H, m), 2.05 (1 H, m), 1.97 (2 H, m), 1.89 (1 H, m), 1.79 (1 H, m), 1.73 (3 H, s), 1.65 (3 H, s), 1.47 (1 H, m).8

IR – Infrared spectrum of neat product can be collected using NaCl plates and agrees

with literature IR spectrum for D-limonene.9

GC/MS – The comprehensive article by Smithet al. describes sample preparation

and solvent extraction of various citrus rinds and includes GC/MS data on oil compositions.10 As indicated on the table below, orange oil obtained through different extraction methods during the testing phase of this experiment showed no differences in composition.

| **Extraction Method** | **D-limonene**  **GC Area %** | **β-myrcene**  **GC Area %** |
| --- | --- | --- |
| Liquid CO2 | 97.07 | 2.93 |
| Pentane | 97.59 | 2.41 |
| Steam distillation | 97.23 | 2.77 |

**Commercial CO2 technology website resources (accessed Feb 2004):**

Extraction of essential oils:

**References and Notes**

**Student Handout:**

**Liquid CO2 Extraction of D-Limonene from Orange Rind**

Essential oils are organic compounds that are extracted from natural sources and used in many products such as flavorings, fragrances, and cleaning products. Many of these oils are classified as terpenes and terpenoids (oxygenated derivatives of terpenes). The general class of terpenes is defined by structures, as shown in Figure 1, which incorporate multiple isoprene units (C5H10). These compounds may be cyclic or acyclic and be saturated or unsaturated. They also may contain various functional groups.

**Figure 1:** Isoprene units organized to form a common terpene

The terpene shown in Figure 1 is limonene. The optically active enantiomer, D-limonene, is the major component of orange oil, which is found in the outer, colored portion (*flavado*) of the rinds of oranges and other citrus fruits.

Industrially, essential oils such as (D-limonene) are isolated by many different methods as described in Figure 2.

**Figure 2:** Industrial methods for obtaining D-limonene

Traditionally essential oils have been extracted through the use of steam distillation or organic solvent extraction. During the past two decades, great strides have been made in technology that uses supercritical or liquid carbon dioxide in place of organic solvents. CO2 is useful as a green alternative solvent because it provides environmental and safety advantages; it is nonflammable, relatively nontoxic, readily available, and environmentally benign. Processing with CO2 also results in minimal liability in the event of unintentional release or residual solvent in the product. Although CO2 is a greenhouse gas, when used as a solvent it is captured from the atmosphere, not generated, resulting in no net environmental harm. Large-scale CO2 processing has had commercial success in many separation and extraction processes. The tunable solubility properties, low toxicity, and ease of removal of CO2 have led to well established CO2 technology for the extraction of various food products, including essential oils and hops, and for the decaffeination of coffee and tea.

Another major benefit of using carbon dioxide as a solvent is its accessible phase changes. Unlike other gases, relatively low temperatures and pressures can be used to form liquid and supercritical CO2. As shown on the phase diagram in Figure 3, CO2 sublimes (goes directly from a solid to a gas) at normal atmospheric pressure of 1.01 bar. The triple point of CO2, where solid, liquid, and gas phases coexist in equilibrium, is achieved at 5.2 bar and -56.6 ºC. At or near this point, dry ice melts, forming liquid carbon dioxide. If the temperature and pressure are increased to the critical point (73.8 bar and 31.0 ºC), the CO2 exists as a supercritical fluid and has no distinct liquid or vapor phase but properties that are similar to both.


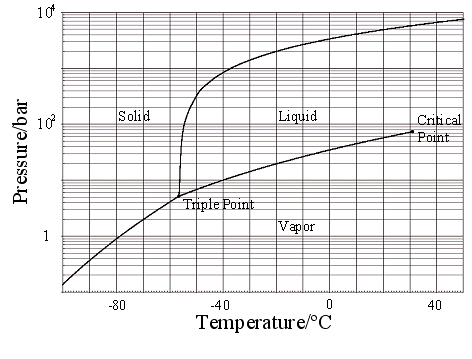


**Figure 3:** The temperature-pressure diagram for carbon dioxide clearly indicates phase transformations, triple point, and critical point. Adapted and used with permission from ChemicaLogic Corporation.1

Dry ice sublimes at atmospheric pressure and temperatures above -78 ºC. If the CO2 is sealed in a vessel during sublimation, the internal pressure in the vessel increases. After the temperature and pressure have increased sufficiently, liquid carbon dioxide forms. Due to this accessible phase change, carbon dioxide can be used for bench top extraction processes.2 In many organic teaching laboratories, D-limonene is extracted through a solid/liquid extraction with pentane or methylene chloride or by a steam distillation. In this experiment you will be given the opportunity to extract D-limonene from orange rinds through the use of liquid CO2. The greenness of the CO2 extraction process can be compared with different extraction procedures through the evaluation of waste, purity, energy use, yield, and safety.

**Experimental Procedure**

**SAFETY PRECAUTIONS:** Due to the high pressure generated during the course of this experiment, there is some **RISK OF VESSEL RUPTURE AND/OR FLYING PROJECTILES**. Under no circumstances should any vessels other than the recommended ones be used. Safety procedures have been implemented to minimize the danger, but it is essential to follow these procedures to protect yourself and other students. Read all safety notes and entire procedure before beginning lab.

**Additional Safety Notes:**

1. **Do not use any glass** during this experiment. Substitution of glass centrifuge tubes or

graduated cylinders could result in serious injuries if shattering should occur.

2. **Always wear eye protection**. Foreign material could become lodged in the eye if not

covered.

3. **Use gloves** when working with dry ice. Contact with dry ice can damage skin tissues.

4. **Do not liquefy CO2 more than 5 times** in the same centrifuge tube. After repeated

liquefaction, the tube may become brittle and rupture.

***Preparation***

1. Prepare the orange rind – Grate only the colored part of the peel of ½ of a

medium-sized orange with the smallest grating surface of a standard cheese grater or zester into a pre-weighed weighing boat. Make sure you have at least 2.5 g of grated orange rind.

2. Prepare the extraction vessel – Record the mass of a 15 mL centrifuge tube by

weighing it in a small tared beaker. Using a 20 cm piece of copper wire and a piece of 1.5 cm filter paper or circle of small-mesh metal screen, make a solid trap (see Figure 4 A-C). Wrap three coils of wire such that the apparatus fits inside the tube with the coils stopping near the beginning of the taper (1.5 mL mark). Use the rest of the wire as a handle projecting up from the coils. All wire should be inside the tube. Cut off any extra wire. Put one piece of filter paper or screen between the coils, making a base to support the solid, and fold up the edges around the wire. Slide solid trap into tube and reweigh. Add approximately 2.5 grams of grated orange rind (NOTE: Do not pack tightly) and record the total weight. Calculate the exact mass of orange peel added to the tube.

3. Prepare the extraction environment – Fill a plastic cylinder or large-mouth

polycarbonate water bottle one half to two thirds full of warm (40-50º C) tap

water. **Do not heat the water in the cylinder or add hot water later in the procedure.** Any sudden increase in temperature of surrounding water when the centrifuge tube is under pressure can cause the cap to blow off suddenly and violently. NOTE: Move items that should not get wet away from the cylinder because splashing may occur if the cap shoots off the tube.


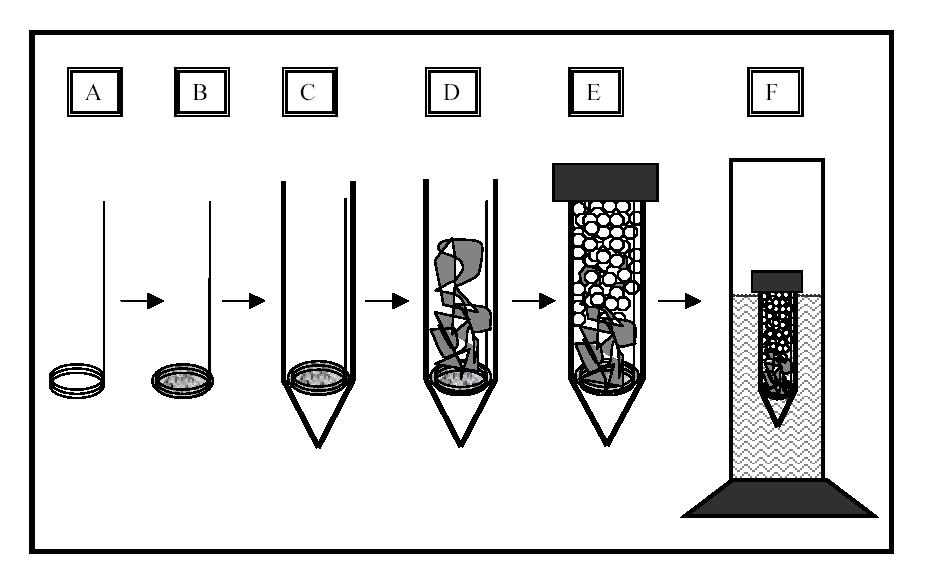


**Figure 4:** Illustration of the extraction procedure. A solid trap is constructed by (A) bending copper wire into coils and a handle, (B) placing filter paper or small-mesh metal screen between the wire coils, and (C) placing the solid trap in centrifuge tube. For extraction, (D) the grated orange peel is placed in the tube, and (E) the tube is filled with dry ice and sealed with a cap. (F) The prepared centrifuge tube is placed in the water in the plastic cylinder.

***Extraction***

**NOTE: Due to the safety issues involved with the rapid increase of pressure during this procedure, it is important to read and understand the entire extraction procedure (#1-8) before beginning!**

1. Fill the rest of the centrifuge tube with crushed dry ice. **Remember to wear gloves!**

Dry ice may be scooped up with the tube, added with a scoop, or poured into the tube from a beaker. Tap the tip of tube on the bench and add more dry ice until the tube is full. Twist cap on tightly until it stops turning. **If cap does not stop turning when tightened, remove the cap before proceeding**. Without a complete seal, the cap is likely to shoot off. Replace the cap with a new one before placing in water. If this does not provide a seal, replace the tube.

2. Immediately after capping, drop centrifuge tube, tapered end down, into the water in

the cylinder (see Figure 4, F). Pressure will begin to build in the tube and gas will escape slowly from the region where the tube and the cap meet. **The plastic cylinder functions as a secondary container** and protects you from possible injury. If the tube shatters or the cap shoots off, any projectiles will be directed straight up. **Do not place anything (including your face) above the cylinder.** Watch the extraction from the side, not the top, of the cylinder.

3. After 15 seconds, liquid CO2 should appear. If no liquid has appeared after 1 minute,

there is not a sufficient seal. Remove tube from cylinder, tighten cap, and put back in water. If repeated trials do not produce liquid, the cap or tube may need to be replaced. Liquid should boil and gas should escape for about 2 minutes and 45 seconds. NOTE: During this time, it is sometimes helpful to slowly rotate the cylinder on its base to prevent the centrifuge tube from freezing to the side of the cylinder. **Never remove the tube from the plastic cylinder when the** **CO2 is liquid.** Tubes may rupture due to pressure and therefore must always remain in secondary containment.

4. As the liquid boils, it should pass through the peel and move to the bottom of the tube.

If it cannot reach the bottom of the tube, the oil will deposit in the region of the tube containing the orange peel. This does not allow for isolation of the product.

5. After the liquid has evaporated and gas is no longer escaping, remove the tube from

the cylinder with tweezers and open the cap. **Open centrifuge tubes slowly** **and only after the gas has escaped.** Opening tubes that are under pressure could result in the cap shooting a great distance.

6. If necessary, rearrange the solid orange peel before the second extraction. A piece of

wire can be used to break up the solid mass and create a channel to the bottom for liquid CO2. Repeat the extraction by refilling the tube with dry ice, resealing the cap, and putting the tube back in the water. A third extraction can be performed in the same manner if desired. NOTE: The orange peel does not need to thaw between extractions.

7. Product (approximately 0.1 mL pale yellow oil) should be in the tip of the tube

when the extraction is complete. Carefully remove the solid and the trap by pulling the wire handle with tweezers. If any solid remains in the tube, remove it with a spatula or wire. NOTE: Keep tube upright to avoid product loss.

8. Dry the outside of the tube with a paper towel, weigh the tube, and determine the mass

of the product. Calculate percentage recovery based upon the yield of the product compared to the mass of rind used.

***Characterization and Analysis***

1. Record an infrared spectrum of neat product on NaCl plates. Compare with

literature IR spectrum for D-limonene.

2. 1H NMR sample can be prepared in CDCl3. Compare with literature 1H NMR

spectrum for D-limonene.

3. Compare yield, greenness, and purity to those of at least one other extraction method,

steam distillation or solvent extraction.3

**References:**

**Classroom Demonstrations:**

**Phase Transitions and Extraction with CO2**

Although there have been many advances in green chemistry in the industrial and research fields, very few demonstrations integrate these concepts into the teaching environment. The following procedures present dramatic visual examples of phase change and introduce commercially successful green chemical processing through the example of CO2 extraction of natural products. We are commonly around carbon dioxide in the liquid phase, but very few people have actually seen it. Every time we use a soda fountain or a CO2 fire extinguisher we are boiling carbon dioxide. The appearance of liquid carbon dioxide is rather unremarkable – it is clear and colorless. The wonder of the demonstrations described in this report is that we observe the carbon dioxide rapidly *melting and boiling* *at the same time* and that we can use the liquid CO2 as an *extraction solvent*.

As shown on the phase diagram in Figure 1, CO2 sublimes (goes directly from a solid to a gas) at normal atmospheric pressure. The triple point of CO2, where solid, liquid, and gas phases coexist in equilibrium, is achieved at 5.2 bar and -56.6 ºC. When the temperature and pressure exceed these values, dry ice melts, forming liquid carbon dioxide. Though the carbon dioxide cannot be said to be at triple point in this demonstration because the system is not at equilibrium, the observation of melting and boiling occurring simultaneously in the phase transition demonstration can serve as a stepping stone to meaningful classroom discussions of phase diagrams and triple point.

**
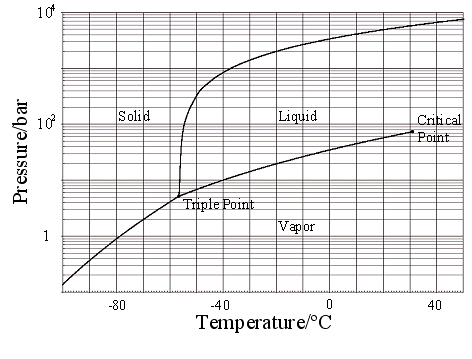
Figure 1:** Carbon Dioxide Phase Diagram. Adapted and used with permission from ChemicaLogic Corporation.1

Traditionally essential oils have been extracted by steam distillation or organic solvent extraction. During the past two decades, great advances have been made in technologies that use supercritical or liquid carbon dioxide in place of organic solvents. CO2 is useful as a green alternative solvent because it provides environmental and safety advantages; it is nonflammable, nontoxic, readily available, and environmentally benign. Processing with CO2 also results in minimal liability in the event of unintentional release or residual solvent in the product. Although CO2 is a greenhouse gas, when it is used as a solvent it is captured from the atmosphere, not generated from fossil fuels, resulting in no net environmental harm. Large-scale CO2 processing has had commercial success in many separation and extraction processes, including isolation of essential oils and decaffeination of coffee and tea. The extraction demonstration introduces this technology using a visually exciting procedure and readily available, inexpensive materials.

*The procedures described here are analogous to those used for the liquid* CO2 *extraction laboratory exercise with added comments specific to their use as demonstrations. Each procedure is intended to stand alone, and therefore in this context the report may include repetitive information.*

**SAFETY PRECAUTIONS for both demonstrations:** Due to the high pressure generated during the course of these demonstrations, there is some **RISK OF VESSEL RUPTURE AND/OR FLYING PROJECTILES**. Under no circumstances should any vessels other than the recommended ones be used. Safety procedures have been implemented to minimize the danger, but it is essential to follow these procedures to protect yourself and students. Read all of the safety notes and the entire procedure before beginning either demonstration.

**Additional Safety Notes:**

1. **Do not use any glass** during this demonstration. Substitution of glass centrifuge tubes

or cylinders could result in serious injuries if shattering should occur.

2. **Always wear eye protection**. Foreign material could become lodged in the eye if

they are not covered.

3. **Use gloves** when working with dry ice. Contact with dry ice can damage skin tissues.

4. **Do not liquefy CO2 more than 5 times** in the same centrifuge tube. After repeated

liquefaction, the tube may become brittle and rupture.

**PHASE TRANSITION DEMONSTRATION**

In this demonstration, a 15 mL plastic centrifuge tube is filled with finely crushed dry ice, capped, and dropped into a clear plastic cylinder filled with warm tap water. After a few seconds, the dry ice begins to melt and boil as excess pressure vents out of the tube. After a few minutes, the CO2 has all boiled away. This demonstration may be projected using a video camera and projector. Visibility of the projected image may be improved by using a dark background or backlighting the apparatus and by adjusting the exposure setting of the video camera.

**Materials**

A large clear shatterproof plastic cylinder – A plastic graduated cylinder may be used but visibility is improved and safety is enhanced by constructing a cylinder out of polycarbonate or a similar suitable plastic. The cylinder that we used was constructed by cementing one end of a 40 cm section of 2½” O.D., ¼” thick clear polycarbonate tubing to the center of a circular piece of ¼” thick acrylic that was 25 cm in diameter. Silicone sealer was applied at the joint to ensure that the apparatus was water-tight. Using this apparatus, students may approach the demonstration to view it if steps are taken to ensure that no one leans over the apparatus and that the apparatus is filled no more than halfway with water.

Several Corning®15 mL centrifuge tubes (Corning® #430052) – If everything works properly, only one centrifuge tube is needed. Experience has shown that the probability that this demonstration will work on the first try with the first tube is roughly inversely proportional to the size of the audience, so have several tubes on hand!

Approximately 0.25 kg of finely crushed dry ice in an ice bucket – The tube does not hold nearly this much, of course, but excess dry ice expedites scooping with the centrifuge tube.

**Procedure**

1. Fill the plastic cylinder halfway with warm (40-50º C) tap water. **Do not heat the water in the cylinder or add hot water later in the procedure.** Any sudden increase in the temperature of the surrounding water when the centrifuge tube is under pressure can cause the cap to blow off suddenly and violently. NOTE: Move items that should not get wet away from the cylinder because splashing may occur if the cap shoots off the tube.

2. Fill the centrifuge tube with crushed dry ice. **Remember to wear gloves!** Dry ice

may be scooped up with the tube, added with a scoop, or poured into the tube from a beaker. Tap the tip of tube on the bench and add more dry ice until the tube is full. Twist the cap on tightly until it stops turning. **If the cap does not stop turning when tightened, remove the cap before proceeding**. Without a complete seal, the cap is likely to shoot off. Replace the cap with a new one before placing in water. If this does not provide a seal, replace the tube.

3. Immediately after capping, drop the centrifuge tube, tapered end down, into the water

in the cylinder. Pressure will begin to build in the tube and gas will escape slowly from the region where the tube and the cap meet. **The plastic cylinder functions as a secondary container** and protects you from possible injury. If the tube shatters or the cap shoots off, any projectiles will be directed straight up. **Do not place anything (including your face) above the cylinder.** Watch the liquefaction from the side, not the top, of the cylinder.

4. After 15 seconds, liquid CO2 should appear. If no liquid has appeared after 1 minute,

there is not a sufficient seal. Remove the tube from the cylinder, tighten the cap, and put it back in the water. If repeated trials do not produce liquid, the cap or tube may need to be replaced. Liquid should boil and gas should escape for about 2 minutes and 45 seconds. NOTE: During this time, it is sometimes helpful to slowly rotate the cylinder on its base to prevent the centrifuge tube from freezing to the side of the cylinder. **Never remove the tube from the plastic cylinder when the** **CO2 is liquid.** Tubes may rupture due to pressure and therefore must always remain in secondary containment.

5. After the liquid has all boiled away and gas is no longer escaping, remove the tube

from the cylinder with forceps and dispose of properly.

**ORANGE OIL EXTRACTION DEMONSTRATION**

In this demonstration, (see Figure below) approximately two and a half grams of grated orange peel and a wire and filter paper solid trap are placed in a 15 mL polypropylene centrifuge tube with a plug seal cap. The centrifuge tube is completely filled with crushed dry ice, capped tightly, and dropped (tapered end down) into a plastic cylinder which is half filled with warm (40-50 ºC) tap water. As pressure builds in the tube, gas escapes slowly through the threading of the cap. After approximately fifteen seconds, the solid begins to melt, and liquid CO2 appears in the tube. The liquid boils, and gas escapes for almost three minutes. The liquid CO2 moves through the solid, extracts the oil from the orange rind, and collects in the bottom of the tube. After the extraction solvent completely evaporates, isolated product remains in the tip of the tube. This demonstration may be projected using a video camera and projector. Visibility of the projected image may be improved by using a dark background or backlighting the apparatus and by adjusting the exposure setting of the video camera.


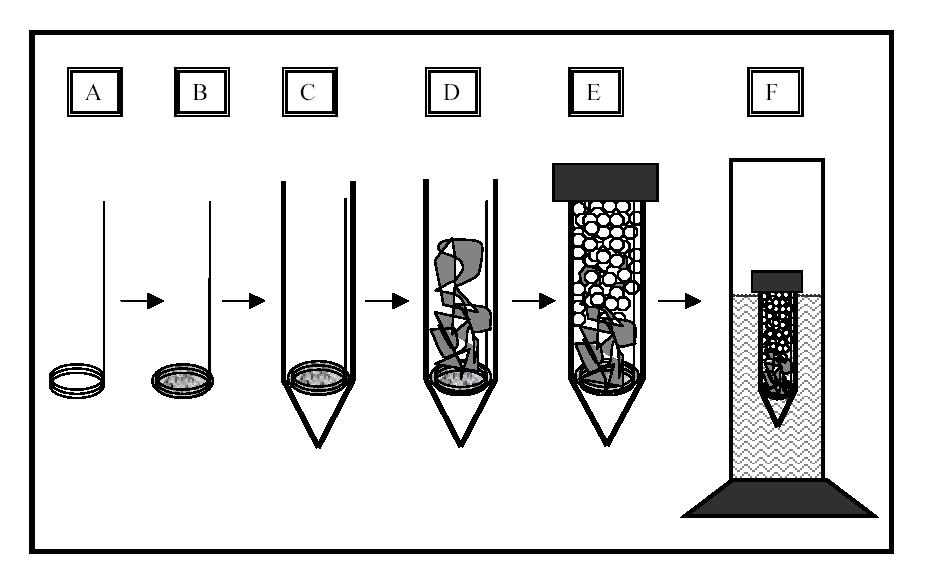


**Materials**

A large clear shatterproof plastic cylinder – A plastic graduated cylinder may be used but visibility is improved and safety is enhanced by constructing a cylinder out of polycarbonate or a similar suitable plastic. The cylinder that we used was constructed by cementing one end of a 40 cm section of 2½” O.D., ¼” thick clear polycarbonate tubing to the center of a circular piece of ¼” thick acrylic that was 25 cm in diameter. Silicone sealer was applied at the joint to ensure that the apparatus was water-tight. Using this apparatus, students may approach the demonstration to view it if steps are taken to ensure that no one leans over the apparatus and that the apparatus is filled no more than halfway with water.

Several Corning®15 mL centrifuge tubes (Corning® #430052) with solid traps and grated orange peel – If everything works properly, only one centrifuge tube is needed. Experience has shown that the probability that this demonstration will work on the first try with the first tube is roughly inversely proportional to the size of the audience, so have several tubes on hand!

Grated orange rind - Grate only the colored part of the peel of an orange with the smallest grating surface of a standard cheese grater or zester.

Several 20 cm pieces of copper wire and several 1.5 cm circles of filter paper or small mesh metal

Approximately 0.25 kg of finely crushed dry ice in an ice bucket – The tube does not hold nearly this much, of course, but excess dry ice expedites scooping with the centrifuge tube.

**Preparation**

1. Make a solid trap (see Figure 2 A-C) for each tube using a 20 cm piece of

copper wire and a circle of 1.5 cm filter paper or small-mesh metal screen. Wrap three coils of wire such that the apparatus fits inside the tube with the coils stopping near the beginning of the taper (1.5 mL mark). Use the rest of the wire as a handle projecting up from the coils. All wire should be inside the tube. Cut off any extra wire. Put one piece of filter paper or screen between the coils, making a base to support the solid, and fold up the edges around the wire. Slide the solid trap into the tube.

2. Add approximately 2.5 grams of grated orange rind to each tube (NOTE: Do

not pack tightly).

**Procedure**

1. Fill a plastic cylinder or large-mouth polycarbonate water bottle one half to two thirds

full of warm (40-50º C) tap water. **Do not heat the water in the cylinder or add hot water later in the procedure.** Any sudden increase in the temperature of the surrounding water when the centrifuge tube is under pressure can cause the cap to blow off suddenly and violently. NOTE: Move items that should not get wet away from the cylinder because splashing may occur.

2. Fill the rest of the centrifuge tube with crushed dry ice. **Remember to wear gloves!**

Dry ice may be scooped up with the tube, added with a scoop, or poured into the tube from a beaker. Tap the tip of tube on the bench and add more dry ice until the tube is full. Twist the cap on tightly until it stops turning. **If the cap does not stop turning when tightened, remove the cap before proceeding**. Without a complete seal, the cap is likely to shoot off. Replace the cap with a new one before placing in water. If this does not provide a seal, replace the tube.

3. Immediately after capping, drop the centrifuge tube, tapered end down, into the water

in the cylinder (see Figure 2, F). Pressure will begin to build in the tube and gas will escape slowly from the region where the tube and the cap meet. **The plastic cylinder functions as a secondary container** and protects you from possible injury. If the tube shatters or the cap shoots off, any projectiles will be directed straight up. **Do not place anything (including your face) above the cylinder.** Watch the extraction from the side, not the top, of the cylinder.

4. After 15 seconds, liquid CO2 should appear. If no liquid has appeared after 1 minute,

there is not a sufficient seal. Remove the tube from the cylinder, tighten cap, and put it back in the water. If repeated trials do not produce liquid, the cap or tube may need to be replaced. Liquid should boil and gas should escape for about 2 minutes and 45 seconds. NOTE: During this time, it is sometimes helpful to slowly rotate the cylinder on its base to prevent the centrifuge tube from freezing to the side of the cylinder. **Never remove the tube from the plastic cylinder when the** **CO2 is liquid.** Tubes may rupture due to pressure and therefore must always remain in secondary containment.

5. As the liquid boils, it should pass through the peel and move to the bottom of the tube.

If it cannot reach the bottom of the tube, the oil will deposit in the region of the tube containing the orange peel. This does not allow for isolation of the product.

6. After the liquid has evaporated and gas is no longer escaping, remove the tube from

the cylinder with tweezers and open the cap. **Open centrifuge tubes slowly** **and only after the gas has escaped.** Opening tubes that are under pressure could result in the cap shooting a great distance.

7. If CO2 did not reach the bottom of the tube, rearrange the solid orange peel and

perform a second extraction. A piece of wire can be used to break up the solid mass and create a channel to the bottom for liquid CO2. Repeat the extraction by refilling the tube with dry ice, resealing the cap, and putting the tube back in the water.

8. Product (approximately 0.1 mL pale yellow oil) should be in the tip of the tube

when the extraction is complete. Carefully remove the solid and the trap by pulling the wire handle with tweezers. NOTE: Keep the tube upright to avoid product loss.

9. A piece of tissue paper or paper towel can be inserted into the centrifuge tube until the

product absorbs onto it. It can then be passed around the classroom and students can smell the intense citrus odor of the product.

10. The waste from this demonstration is not hazardous and requires no special handling.

Although we do not recommend using the centrifuge tubes for more than five liquefactions, at the end of this experiment they can be washed and used for other non-pressurized processes or recycled with other plastics. Wire and metal screen can be reused or thrown away. Used orange rind and filter paper can be placed in a compost bin or in the garbage.

**Reference:**
